# Supplementary material for: Categorization, Measurement, and Effortlessness of Daily Self-Control Strategies
Source: Research Square preprint supplement (doi:10.21203/rs.3.rs-7147774/v1), 2025-09-12
Supplement: Supplementary file 1 [file f74a6ef4d33e413506bf1868.docx]

Appendix A

The measurement of beneficial habits

请评价以下描述多大程度符合你的真实情况，从1到5计分。

1 = 完全不符合，2 = 有点符合， 3 = 中等符合， 4 = 很符合，5 = 完全符合。

Please rate the extent to which the following description reflects your true situation on a scale of 1 to 5.

1 = Not me at all， 2 = Slightly like me， 3 = Moderately like me， 4 = Very much like me， 5 = Exactly me.

|  | Chinese version | English version |
| --- | --- | --- |
| 1 | 我习惯a健康饮食 | I am used to eating healthy food. |
| 2 | 我习惯规律的作息安排 | I am accustomed to a regular schedule. |
| 3 | 我有健身的习惯 | I have the habit of exercising. |
| 4 | 我习惯在学习/工作时排除其他事物的干扰 | I am accustomed to eliminating distractions when I study or work. |
| 5 | 我习惯理性消费 | I am accustomed to making rational purchases. |

*Note.* a. Although the Chinese lexeme "习惯" primarily denotes habits as a noun, it also functions verbally in syntactic constructions, corresponding to the English phrasal verb "to be accustomed to".

Appendix B

The self-Control Strategy Scale

指导语：

我们会设置各种目标，包括长期目标如“5年后买车买房”，也有短期目标如“今天做完100个俯卧撑”。

请回忆在你的学习、工作和日常活动中，你是如何处理有碍于目标完成的诱惑或冲动的？在感到不想做或难以坚持时，又是如何坚持做应该做的事的？

以下罗列了常见的自控策略，请根据你的实际情况，选择你**整体上**使用这些策略的**频率**，按1-5打分。

1 = 从不， 2 = 偶尔，3 = 有时，4 = 经常，5 = 总是。

注意：
* 每个人的自控方式不同，答案无对错之分，请如实作答。
* 如果你觉得难以具体回忆，就按照第一印象快速做选择。

Instructions:

We will present various types of goals, including long-term goals (e.g., "buying a car or house in 5 years") and short-term goals (e.g., "completing 100 push-ups today").

Please reflect on how you typically handle temptations or impulses that interfere with achieving your goals and how do you manage to do what needs to be done when you feel reluctant to act or struggle to persist during academic, professional, or daily activities.

Below is a list of common self-control strategies. Please rate how frequently you use each strategy on a 5-point scale: 1 = never, 2 = occasionally, 3 = sometimes, 4 = often, 5 = always.

Notes:

• There are no right or wrong answers, as self-control strategies vary across individuals. Please respond as truthfully as possible.

• If recalling specific instances is difficult, respond based on your initial intuition.

|  | Chinese version | English version |
| --- | --- | --- |
| 1 | 回避诱惑：事先回避有诱惑的情境，或拒绝、移除、隔离诱惑。 | Temptation avoidance: Avoid tempting situations in advance or refuse, remove, or isolate temptations. |
| 2 | 目标提醒：借助外物提醒自己做该做的事。 | Setting goal reminder: Use external objects to remind yourself to do what should be done. |
| 3 | 进展管理：记录并定期检查目标进展。 | Progress management: Record and regularly review progress toward goals. |
| 4 | 限制诱惑：限制放纵行为的时间、频率或范围。 | Restricting temptation: Restrict the frequency, time duration, and intensity of indulgent behaviors. |
| 5 | 设置惩罚：事先设置违背目标或计划的惩罚措施。 | Setting up a punishment system: Set up a punishment system in advance for violating goals or plans. |
| 6 | 设置奖励：事先设置抵制诱惑或完成计划的奖励。 | Setting up a reward system: Set up a reward system in advance for resisting temptations or completing plans. |
| 7 | 目标承诺：告诉别人自己要做什么。 | Goal commitment: Tell people about your goals. |
| 8 | 优化任务：让目标行为变得更有趣、更容易或更有动力去做。 | Task optimizing: Make the goal-related behaviors more fun, accessible, or motivating. |
| 9 | 固定时间：选择每天/周/月固定的时间做目标相关的事情。 | Fixing time: Choose a fixed time every day/week/month to do things related to the goal. |
| 10 | 机会限制：预先限制自己做放纵行为的可能性。 | Restricting opportunity: Prelimit the chance or possibility of engaging in indulgent behaviors. |
| 11 | 他人监督：邀请别人监督自己。 | Seeking supervision: Invite others to supervise you. |
| 12 | 找到同伴：找到与自己目标相同的同伴，共同执行目标。 | Finding partner: Find partners with the same goals as yours and pursue the goals together. |
| 13 | 消除诱惑：在诱惑存在时，将其移除或者远离它。 | Eliminating temptation: When temptation arises, remove or stay away from it. |
| 14 | 积极期望：难以坚持时，设想抵制诱惑坚持目标的积极结果。 | Positive expectations: Envision positive outcomes of resisting temptation and sticking to the goals when it is difficult to persist in the goals. |
| 15 | 设想后果：难以坚持时，设想没能抵制诱惑的消极后果。 | Imagining consequences: Imagine the negative consequences of not being able to resist the temptation when it is difficult to persist in the goals. |
| 16 | 建构意义：难以坚持时，为目标行为寻找做的理由。 | Constructing meaning: When it is difficult to persist, find reasons for the goal-related behaviors. |
| 17 | 自我鼓励：在难以坚持时鼓励自己。 | Self-encouragement: Encourage yourself when it is difficult to persist in the goals. |
| 18 | 压制冲动：某种有碍目标的欲望或念头出现时，直接要求自己压制它们。 | Suppressing impulses: When certain desires or thoughts that hinder the goals appear, directly ask yourself to suppress them. |
| 19 | 推迟放纵：在想要追求诱惑时，让自己晚点再这么做。 | Postpone indulgence: When you want to pursue temptations, ask yourself to do it later. |

**Scale Structure**

Temptation-Oriented Strategies (诱惑导向的策略): items 1,4,10,13

Goal-Oriented Preventive Strategies (目标导向的预防性策略): items 2, 3, 5, 6, 8, 9

Interventive Strategies (干预性策略): items 14, 15, 16, 17, 18, 19

Interpersonal Preventive Strategies (人际相关的预防性策略): items 7, 11, 12
